# Supplementary material for: Discovery of robust and highly specific microbiome signatures of non-alcoholic fatty liver disease
Source: PubMed Central journal article supplement — Microbiome. 2025 Jan 14;13:10. doi: 10.1186/s40168-024-01990-y (PMC11730835; doi:10.1186/s40168-024-01990-y), 2025-01-14

# Beta Diversity of Species in NAFLD study cohorts

PCoA2 12%

$R^2 = 0.01$

P value = 0.09

Groups

— MRS NAFLD

— Biopsy NAFLD

PCoA1 43%

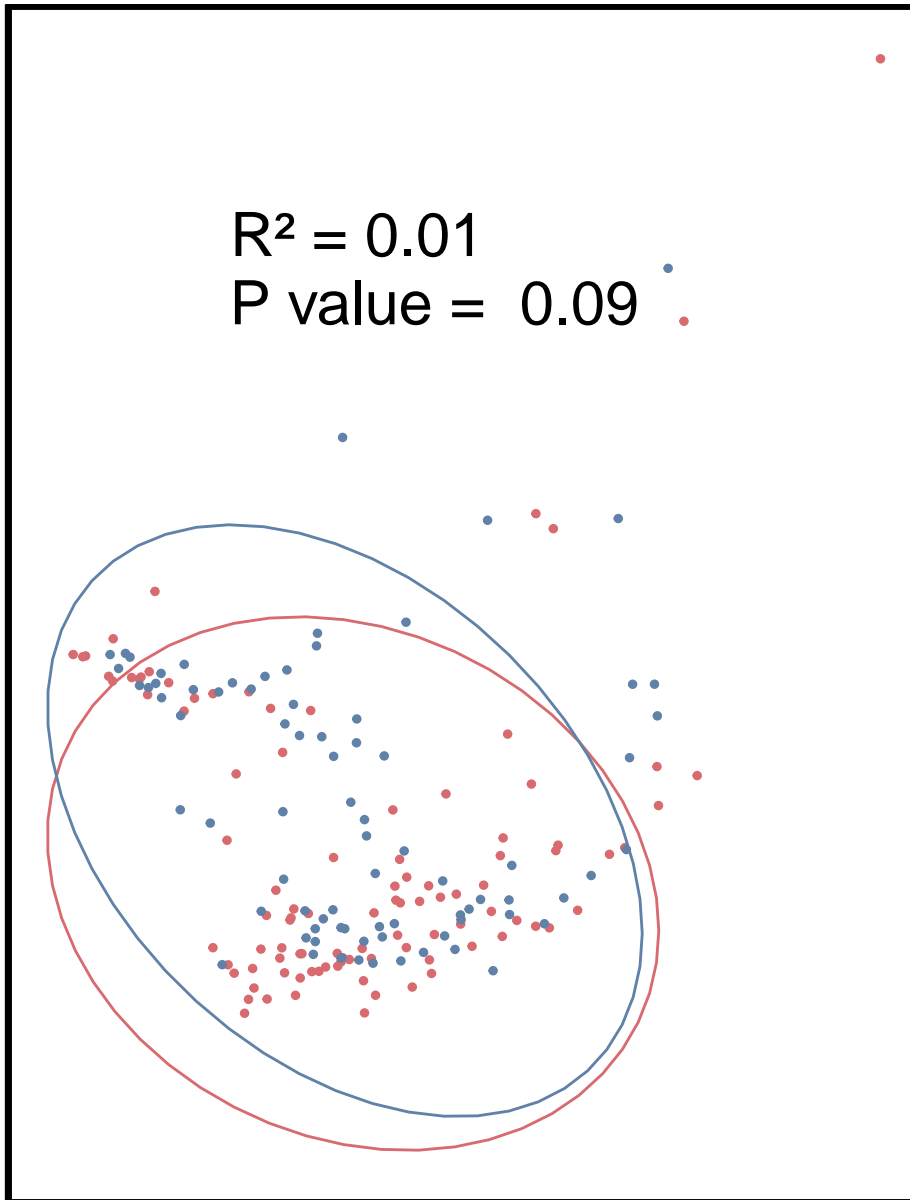

Supplement: 40168_2024_1990_MOESM11_ESM.pdf [file 40168_2024_1990_MOESM11_ESM.pdf]
