# Supplementary figures and images for: Discovery of robust and highly specific microbiome signatures of non-alcoholic fatty liver disease
Source: PubMed Central journal article supplement — Microbiome. 2025 Jan 14;13:10. doi: 10.1186/s40168-024-01990-y (PMC11730835; doi:10.1186/s40168-024-01990-y), 2025-01-14

# Comparison of Shannon Index

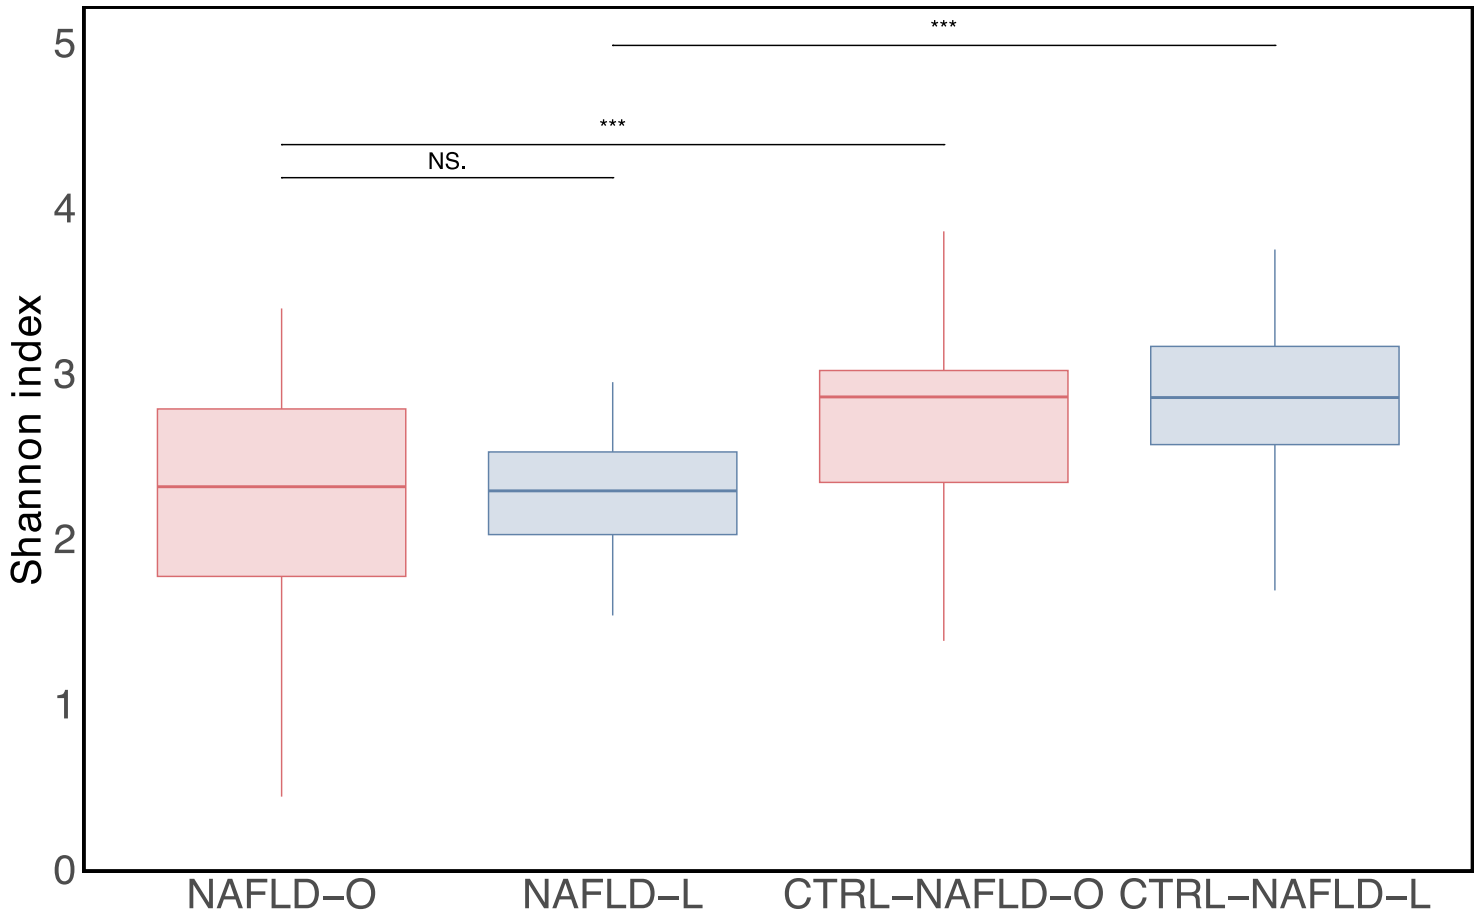

Supplement: 40168_2024_1990_MOESM7_ESM.pdf [file 40168_2024_1990_MOESM7_ESM.pdf]

### Species

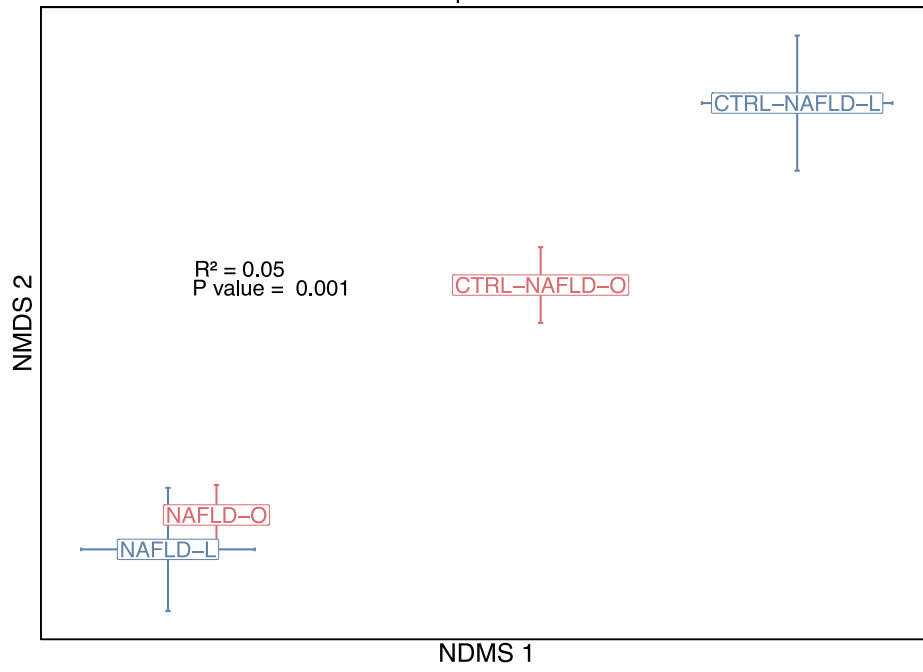

### KEGG Pathways

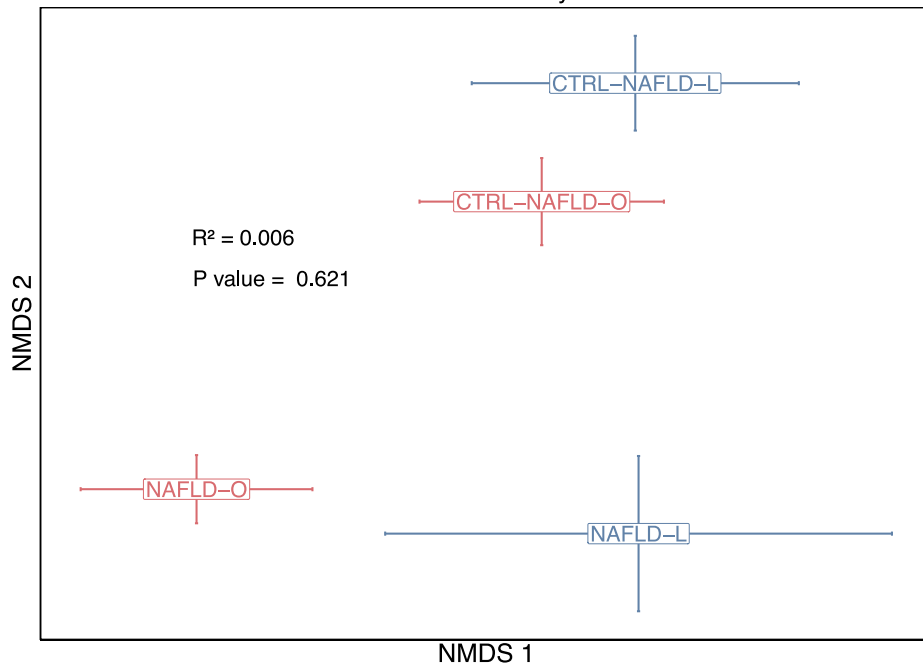

### Metabolites

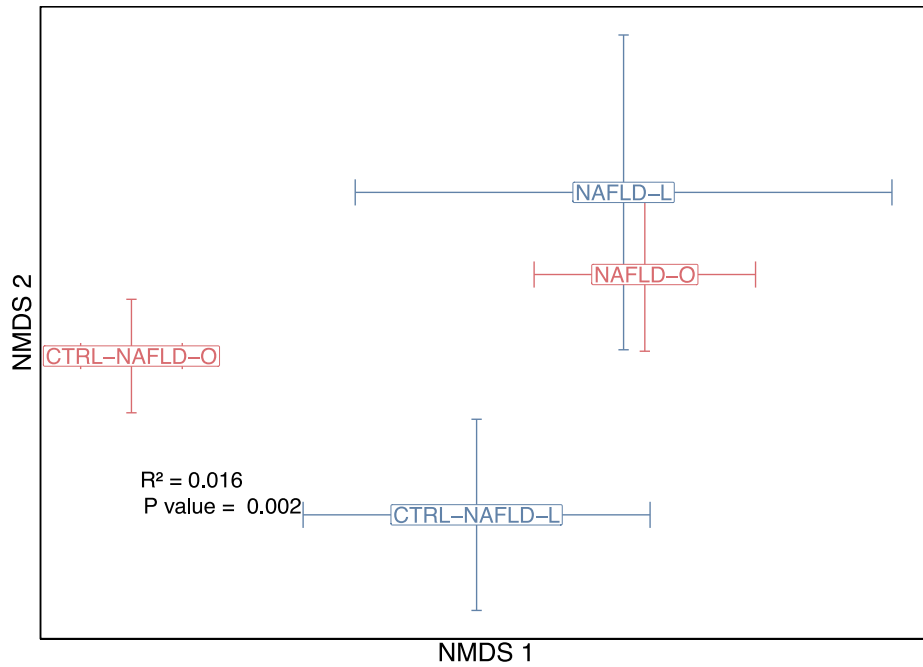

Supplement: 40168_2024_1990_MOESM8_ESM.pdf [file 40168_2024_1990_MOESM8_ESM.pdf]

### Species

Accuracy = 0.824

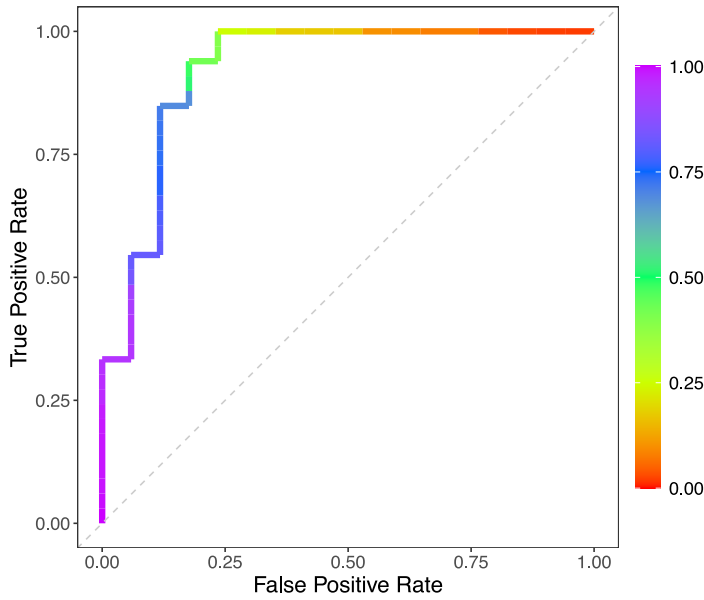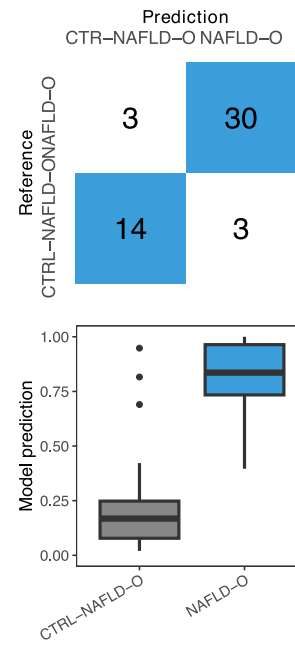

### Pathways

Accuracy = 0.588

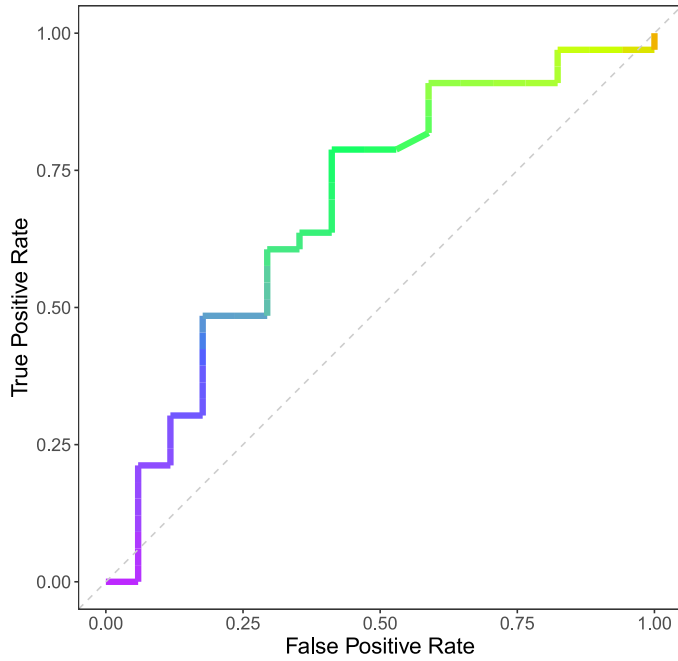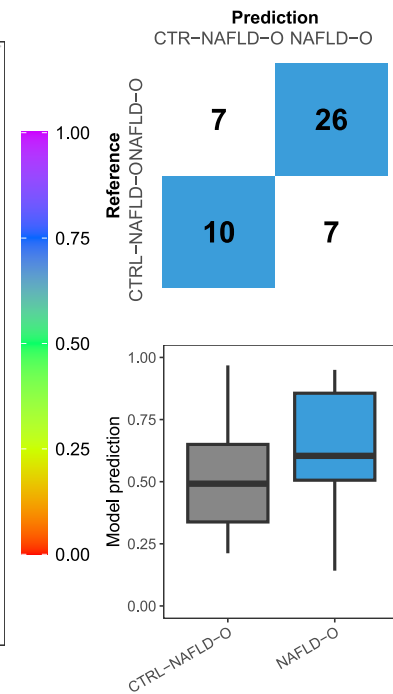

### Metabolites

Accuracy = 0.875

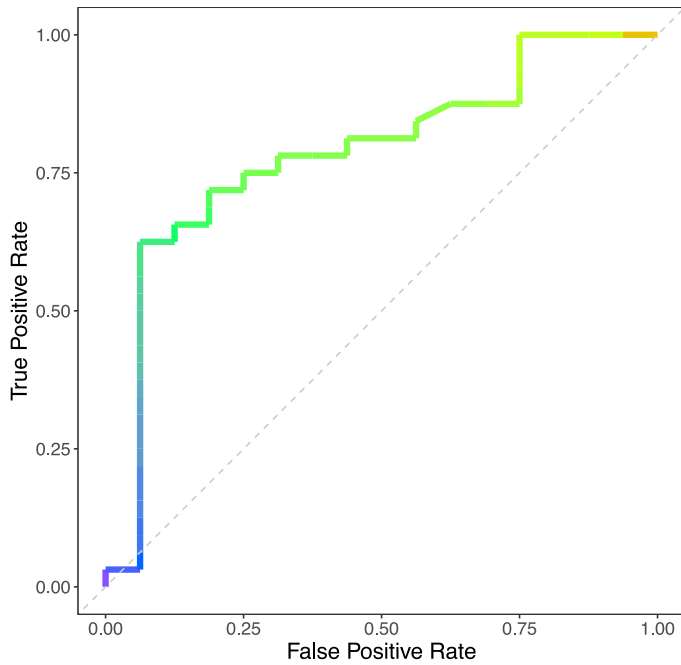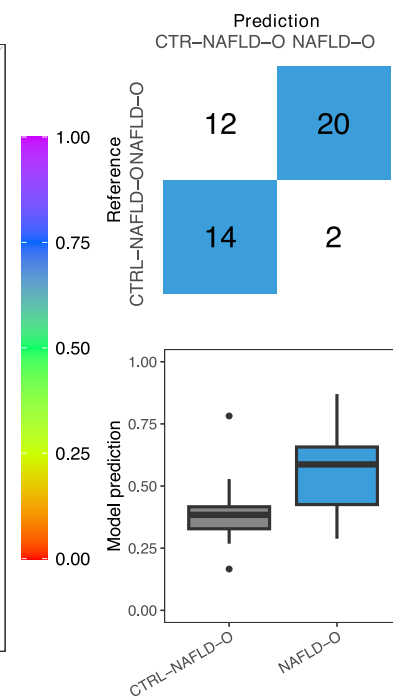

Supplement: 40168_2024_1990_MOESM9_ESM.pdf [file 40168_2024_1990_MOESM9_ESM.pdf]
